# Supplementary material for: Transcriptional Orchestration of the Global Cellular Response of a Model Pennate Diatom to Diel Light Cycling under Iron Limitation
Source: PubMed Central journal article supplement (PMC5156380; doi:10.1371/journal.pgen.1006490), 2016-12-14

## A Targeting predictions

|       | Gene Model                | Signal P                                | Cleavage         | ASAFIND       | Mitroprot | TMHMM        | Verdict               |
|-------|---------------------------|-----------------------------------------|------------------|---------------|-----------|--------------|-----------------------|
| NAGS1 | Phatr3_J10902.t1 (+108aa) | v3.0: N (0.025)*<br>v4.1: N (D = 0.254) | --               | --            | 0.9489    | Yes<br>44-63 | TM domain<br>/plastid |
|       | Phatr3_J10902.t1 (+72aa)  | v3.0: Y (0.814)<br>v4.1: N (D = 0.384)  | TLA-TL           | Y – low conf. | 0.2666    | No           |                       |
|       | Phatr3_J10902.t1          | v3.0: N (0.025)<br>v4.1: N (D = 0.098)  | --               | --            | 0.0029    | No           |                       |
| NAGS2 | Phatr3_J44492.t1          | v3.0: Y (0.977)<br>v4.1: Y (D = 0.705)  | SYT-GI<br>AKS-YT | N<br>N        | 0.6859    | No           | Signal peptide        |

\*Signal anchor probability = 0.916

## B Sequences

### NAGS1

#### >Phatr3\_J10902.t1\_ESTextended

MNTAIVVYRQQLRLLQLLTVSSRSPPLRSWRGLSSKMKTSTHKVFGSLSTWVATLATLPIHWITESFVPSALPLNQKSPSLRRPPLASFPVFPNPLPITTASSS  
 SPLHMAATDKEQQLDAAANTKHAATAPKGNESHNVGHSSLSNVGGKAPKDFHVDHEAGLRVDGRSSPQRHLSSTTKESTLSFQNVTFEAQKPKGYSTFDASS  
 LLAVDPSCINIDTVPPEEEFPGPTEEALKRLEPFVSMFRGSANYIANHRNTLAVYHIPGGLLDQPGNNVFRDLMNNDIALTWLLGMKIVLVVGCRRHQIAKRVAQH  
 QSDSSLEENLQSRHGLRVTDEKTLRIVKKEEAGYVRFEVERQLARSLRMQGGMGNAPGVGSGTQGYYDGNVVSNGNFYSAQPFGLIDGVDFKYTGFRVREVEWI  
 RQKHNNRDI CLMTTLGVSFSGEVFNVNSEALASVAGALEASKVIYFTEQEMELRHTQHKKIQSLRMSDANNLLEYSGVTIHKKGFVQLDDELHEMDKAALDM  
 LLKIGWSVQALEMGVKRAHII SPKHGALLQELYTRDGSGLLISGDLYDGIRANVHDVAIHDLISPLIQMGTIDRPKSVLEKDVESYVYVTRDNHIVASGQL  
 KIFENGFAEIGCLLVNQYRSRGRGDAMLGYLERLCLVNSCSSIFVLSTQTMWFVVERGFDEVGVDRPLPPSRQATYNYKRNSKIYMKKIESDRDLDASELWWRN

Transmembrane Domain  
 EST extended model  
 PRK05279 Domain

### NAGS2

#### >Phatr3\_J44492.t1

MVMSLTAIFVISTWVAKSYTGIPKASVRHPHTGPRATGSFTVNVKRKSSIAVQFSASTESSDFSTWDGSAPLSVDDSYDELVTGALQISPLSVNDPALVEFTES  
 TFRKSVRNGKVL PAMGSSHYPFAMMLQGSAPYIAAHAGKTAVIHIPGDVLDGTPNADALLADISLRLLGMKIVIVIGCRFDLDRCDMDFAENAHECHNALKI  
 TNAETLRYVEEEVGFRLRTEMERKLNRCRLRMTGGVSGTKDAPVPDGNVVSNGNFYTAQQFGIIQGEDFEYTGFTPTGQVHAENIQRVLNNDVLLTTVGLSTLGE  
 LVNVNGYHLAASVAAALKAYKVIYMSNEGSVLQKKGENISIQELPLSFAKAVLDYHHVEVHKTFGATFERARQSLEPHAVELLLHLGWASWALDHGVKRAHVVN  
 PGDGALLEELFTSKNGANTCLYHDEENTKVEEIEIGQDDWDSFFASAKQGGQKEIYIKKQQSSKRF

## C Domain architecture

### NAGS1

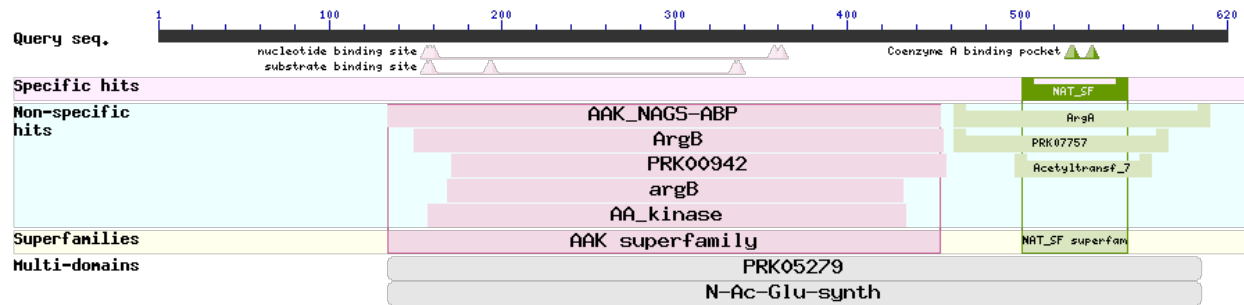

### NAGS2

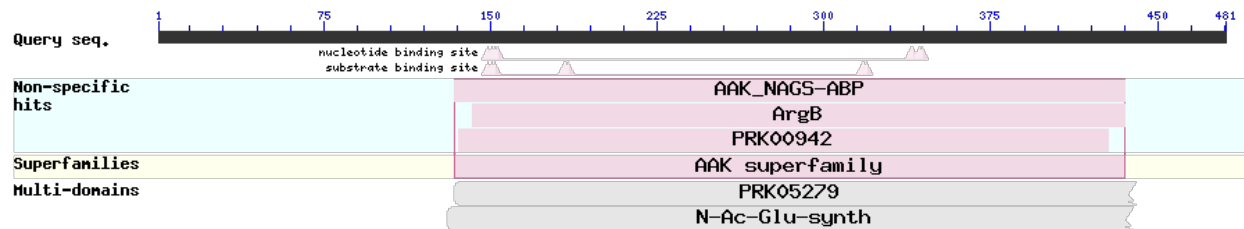

Supplement: pgen.1006490.s020.pdf [file pgen.1006490.s020.pdf]
