# Supplementary material for: Transcriptional Orchestration of the Global Cellular Response of a Model Pennate Diatom to Diel Light Cycling under Iron Limitation
Source: PubMed Central journal article supplement (PMC5156380; doi:10.1371/journal.pgen.1006490), 2016-12-14
Supplement: pgen.1006490.s023.pdf [file pgen.1006490.s023.pdf]

**S1 Table. Experimental Design.** *P. tricornutum* was grown on a 12:12 light:dark regime. Lights were on at 9AM, and off at 9PM, therefore cultures were sampled 3 hours before (6AM/6PM) and 1 hour (10AM/10PM) after each light transition.

| Experiment               | [Fe] |     | Day 1       |            |            |             | Day 2      |            |      |     |
|--------------------------|------|-----|-------------|------------|------------|-------------|------------|------------|------|-----|
|                          | pM   |     | 10AM        | 2PM        | 6PM        | 10PM        | 2AM        | 6AM        | 10AM | 2PM |
| L1                       | 15   | 27  |             | X          | X          | X           | X          | X          | X    | X   |
| L2                       | 15   | 27  | X           | X          | X          | X           | X          | X          | X    |     |
| M1                       | 30   | 54  |             | X          | X          | X           | X          | X          | X    | X   |
| M2                       | 30   | 54  | X           | X          | X          | X           | X          | X          | X    |     |
| H1                       | 300  | 540 |             | X          | X          | X           | X          | X          | X    | X   |
| H2                       | 300  | 540 | X           | X          | X          | X           | X          | X          | X    |     |
| H3                       | 300  | 540 | X           | X          | X          | X           | X          | X          | X    |     |
| <b>Sample (n) Totals</b> |      |     | <b>10AM</b> | <b>2PM</b> | <b>6PM</b> | <b>10PM</b> | <b>2AM</b> | <b>6AM</b> |      |     |
| L Total                  | 15   | 27  | 3           | 3          | 2          | 2           | 2          | 2          |      |     |
| M Total                  | 30   | 54  | 3           | 3          | 2          | 2           | 2          | 2          |      |     |
| H Total                  | 300  | 540 | 4           | 5          | 3          | 3           | 3          | 3          |      |     |
| <b>Combined Total</b>    |      |     | <b>10</b>   | <b>11</b>  | <b>7</b>   | <b>7</b>    | <b>7</b>   | <b>7</b>   |      |     |
