# Supplementary material for: Transcriptional Orchestration of the Global Cellular Response of a Model Pennate Diatom to Diel Light Cycling under Iron Limitation
Source: PubMed Central journal article supplement (PMC5156380; doi:10.1371/journal.pgen.1006490), 2016-12-14
Supplement: pgen.1006490.s024.pdf [file pgen.1006490.s024.pdf]

S2 Table. GO term enrichment in WGCNA modules.

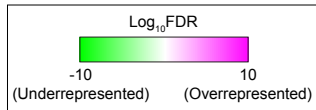

WGCNA Modules

|                                                | 199 cyan | 81 darkorange | 232 tan | 150 grey60 | 299 purple | 179 lightcyan | 91 orange | 141 lightgreen | 187 midnightblue | 321 magenta | 427 green | 103 darkgreen | 121 royalblue | 104 darkred | 488 brown | 535 blue | 444 yellow | 245 greenyellow | 330 black | 328 pink | 219 salmon | 941 turquoise | 415 red | 123 lightyellow | 94 darkgrey | 98 darkturquoise |     |
|------------------------------------------------|----------|---------------|---------|------------|------------|---------------|-----------|----------------|------------------|-------------|-----------|---------------|---------------|-------------|-----------|----------|------------|-----------------|-----------|----------|------------|---------------|---------|-----------------|-------------|------------------|-----|
| <b>Genes in Module (#):</b>                    | 199      | 81            | 232     | 150        | 299        | 179           | 91        | 141            | 187              | 321         | 427       | 103           | 121           | 104         | 488       | 535      | 444        | 245             | 330       | 328      | 219        | 941           | 415     | 123             | 94          | 98               |     |
| <b>Go Terms</b>                                |          |               |         |            |            |               |           |                |                  |             |           |               |               |             |           |          |            |                 |           |          |            |               |         |                 |             |                  |     |
| Tetrapyrrole biosynthesis                      | 6.7      | 0.0           | 0.0     | 0.0        | 0.0        | 0.0           | 0.0       | 0.0            | 0.0              | 0.0         | 0.0       | 0.0           | 0.0           | 0.0         | 0.0       | 0.0      | 0.0        | 0.0             | 0.0       | 0.0      | 0.0        | 0.0           | 0.0     | 0.0             | 0.0         | 0.0              | 0.0 |
| Uroporphyrinogen decarboxylase                 | 2.7      | 0.0           | 0.0     | 0.0        | 0.0        | 0.0           | 0.0       | 0.0            | 0.0              | 0.0         | 0.0       | 0.0           | 0.0           | 0.0         | 0.0       | 0.0      | 0.0        | 0.0             | 0.0       | 0.0      | 0.0        | 0.0           | 0.0     | 0.0             | 0.0         | 0.0              | 0.0 |
| Isoprenoid biosynthesis                        | 1.7      | 0.0           | 0.0     | 0.0        | 0.0        | 0.0           | 0.0       | 0.0            | 0.0              | 0.0         | 0.0       | 0.0           | 0.0           | 0.0         | 0.0       | 0.0      | 0.0        | 0.0             | 0.0       | 0.0      | 0.0        | 0.0           | 0.0     | 0.0             | 0.0         | 0.0              | 0.0 |
| Membrane part                                  | 0.0      | 5.2           | 0.0     | 0.0        | 0.0        | 0.0           | 0.0       | 0.0            | 0.0              | 0.0         | 0.0       | 0.0           | 0.0           | 0.0         | 0.0       | 0.0      | 0.0        | 0.0             | 0.0       | 0.0      | 0.0        | 0.0           | 0.0     | 0.0             | 0.0         | 0.0              | 0.0 |
| Photosystem II                                 | 0.0      | 3.2           | 0.0     | 0.0        | 0.0        | 0.0           | 0.0       | 0.0            | 0.0              | 0.0         | 0.0       | 0.0           | 0.0           | 0.0         | 0.0       | 0.0      | 0.0        | 0.0             | 0.0       | 0.0      | 0.0        | 0.0           | 0.0     | 0.0             | 0.0         | 0.0              | 0.0 |
| Nucleosome core                                | 0.0      | 0.0           | 4.6     | 0.0        | 0.0        | 0.0           | 0.0       | 0.0            | 0.0              | 0.0         | 0.0       | 0.0           | 0.0           | 0.0         | 0.0       | 0.0      | 0.0        | 0.0             | 0.0       | 0.0      | 0.0        | 0.0           | 0.0     | 0.0             | 0.0         | 0.0              | 0.0 |
| Histone-fold                                   | 0.0      | 0.0           | 4.2     | 0.0        | 0.0        | 0.0           | 0.0       | 0.0            | 0.0              | 0.0         | 0.0       | 0.0           | 0.0           | 0.0         | 0.0       | 0.0      | 0.0        | 0.0             | 0.0       | 0.0      | 0.0        | 0.0           | 0.0     | 0.0             | 0.0         | 0.0              | 0.0 |
| Nucleosome assembly                            | 0.0      | 0.0           | 3.1     | 0.0        | 0.0        | 0.0           | 0.0       | 0.0            | 0.0              | 0.0         | 0.0       | 0.0           | 0.0           | 0.0         | 0.0       | 0.0      | 0.0        | 0.0             | 0.0       | 0.0      | 0.0        | 0.0           | 0.0     | 0.0             | 0.0         | 0.0              | 0.0 |
| Histone 2A                                     | 0.0      | 0.0           | 2.7     | 0.0        | 0.0        | 0.0           | 0.0       | 0.0            | 0.0              | 0.0         | 0.0       | 0.0           | 0.0           | 0.0         | 0.0       | 0.0      | 0.0        | 0.0             | 0.0       | 0.0      | 0.0        | 0.0           | 0.0     | 0.0             | 0.0         | 0.0              | 0.0 |
| Establishment of protein localization          | 0.0      | 0.0           | 1.0     | 0.0        | 0.0        | 0.0           | 0.0       | 0.0            | 0.0              | 0.0         | 0.0       | 0.0           | 0.0           | 0.0         | 0.0       | 0.0      | 0.0        | 0.0             | 0.0       | 0.0      | 0.0        | 2.0           | 0.0     | 0.0             | 0.0         | 0.0              | 0.0 |
| Mismatch repair                                | 0.0      | 0.0           | 0.0     | 0.0        | 3.2        | 0.0           | 0.0       | 0.0            | 0.0              | 0.0         | 0.0       | 0.0           | 0.0           | 0.0         | 0.0       | 0.0      | 0.0        | 0.0             | 0.0       | 0.0      | 0.0        | 0.0           | 0.0     | 0.0             | 0.0         | 0.0              | 0.0 |
| DNA replication                                | 0.0      | 0.0           | 0.0     | 0.0        | 3.1        | 0.0           | 0.0       | 0.0            | 0.0              | 0.0         | 0.0       | 0.0           | 0.0           | 0.0         | 0.0       | 0.0      | 0.0        | 0.0             | 0.0       | 0.0      | 0.0        | 0.0           | 0.0     | 0.0             | 0.0         | 0.0              | 0.0 |
| Proteasome complex                             | 0.0      | 0.0           | 0.0     | 0.0        | 2.0        | 0.0           | 0.0       | 0.0            | 0.0              | 0.0         | 0.0       | 0.0           | 0.0           | 0.0         | 0.0       | 0.0      | 0.0        | 0.0             | 0.0       | 0.0      | 0.0        | 0.0           | 0.0     | 0.0             | 0.0         | 0.0              | 0.0 |
| Catabolic processes                            | 0.0      | 0.0           | 0.0     | 0.0        | 1.4        | 0.0           | 0.0       | 0.0            | 0.0              | 0.0         | 0.0       | 0.0           | 0.0           | 0.0         | 0.0       | 0.0      | 0.0        | 0.0             | 0.0       | 0.0      | 0.0        | 0.0           | 0.0     | 0.0             | 0.0         | 0.0              | 0.0 |
| Protein phosphorylation                        | 0.0      | 0.0           | 0.0     | 0.0        | 0.0        | 0.0           | 0.0       | 0.0            | 0.0              | 0.0         | 0.0       | 4.0           | 0.0           | 0.0         | 0.0       | 0.0      | 0.0        | 0.0             | 0.0       | 0.0      | 0.0        | 0.0           | 0.0     | 0.0             | 0.0         | 0.0              | 0.0 |
| Motor activity                                 | 0.0      | 0.0           | 0.0     | 0.0        | 0.0        | 0.0           | 0.0       | 0.0            | 0.0              | 0.0         | 0.0       | 1.3           | 0.0           | 0.0         | 0.0       | 0.0      | 0.0        | 0.0             | 0.0       | 0.0      | 0.0        | 0.0           | 0.0     | 0.0             | 0.0         | 0.0              | 0.0 |
| Negative regulation of catalytic activity      | 0.0      | 0.0           | 0.0     | 0.0        | 0.0        | 0.0           | 0.0       | 0.0            | 0.0              | 0.0         | 0.0       | 0.0           | 3.4           | 0.0         | 0.0       | 0.0      | 0.0        | 0.0             | 0.0       | 0.0      | 0.0        | 0.0           | 0.0     | 0.0             | 0.0         | 0.0              | 0.0 |
| Serine-type endopeptidase activity             | 0.0      | 0.0           | 0.0     | 0.0        | 0.0        | 0.0           | 0.0       | 0.0            | 0.0              | 0.0         | 0.0       | 0.0           | 3.1           | 0.0         | 0.0       | 0.0      | 0.0        | 0.0             | 0.0       | 0.0      | 0.0        | 0.0           | 0.0     | 0.0             | 0.0         | 0.0              | 0.0 |
| Proteolysis                                    | 0.0      | 0.0           | 0.0     | 0.0        | 0.0        | 0.0           | 0.0       | 0.0            | 0.0              | 0.0         | 0.0       | 0.0           | 1.4           | 0.0         | 0.0       | 0.0      | 0.0        | 0.0             | 0.0       | 0.0      | 0.0        | 0.0           | 0.0     | 0.0             | 0.0         | 0.0              | 0.0 |
| Chromatin modification                         | 0.0      | 0.0           | 0.0     | 0.0        | 0.0        | 0.0           | 0.0       | 0.0            | 0.0              | 0.0         | 0.0       | 0.0           | 0.0           | 0.0         | 0.0       | 0.0      | 0.0        | 0.0             | 2.2       | 0.0      | 0.0        | 0.0           | 0.0     | 0.0             | 0.0         | 0.0              | 0.0 |
| Zn-finger                                      | 0.0      | 0.0           | 0.0     | 0.0        | 0.0        | 0.0           | 0.0       | 0.0            | 0.0              | 0.0         | 0.0       | 0.0           | 0.0           | 0.0         | 0.0       | 0.0      | 0.0        | 0.0             | 1.3       | 0.0      | 0.0        | 0.0           | 0.0     | 0.0             | 0.0         | 0.0              | 0.0 |
| DNA topo-isomerase II                          | 0.0      | 0.0           | 0.0     | 0.0        | 0.0        | 0.0           | 0.0       | 0.0            | 0.0              | 0.0         | 0.0       | 0.0           | 0.0           | 0.0         | 0.0       | 0.0      | 0.0        | 0.0             | 1.1       | 0.0      | 0.0        | 0.0           | 0.0     | 0.0             | 0.0         | 0.0              | 0.0 |
| Structural constituent of ribosome             | 0.0      | 0.0           | 0.0     | 0.0        | 0.0        | 0.0           | 0.0       | 0.0            | 0.0              | 0.0         | 0.0       | 0.0           | 0.0           | 0.0         | 0.0       | 0.0      | 0.0        | 0.0             | 0.0       | 21.3     | 0.0        | 0.0           | 0.0     | 0.0             | 57.3        | 0.0              | 0.0 |
| Photosynthetic membrane                        | 0.0      | 0.0           | 0.0     | 0.0        | 0.0        | 0.0           | 0.0       | 0.0            | 0.0              | 0.0         | 0.0       | 0.0           | 0.0           | 0.0         | 0.0       | 0.0      | 0.0        | 0.0             | 0.0       | 3.6      | 0.0        | 0.0           | 0.0     | 0.0             | 0.0         | 0.0              | 0.0 |
| rRNA binding                                   | 0.0      | 0.0           | 0.0     | 0.0        | 0.0        | 0.0           | 0.0       | 0.0            | 0.0              | 0.0         | 0.0       | 0.0           | 0.0           | 0.0         | 0.0       | 0.0      | 0.0        | 0.0             | 0.0       | 3.3      | 0.0        | 0.0           | 0.0     | 0.0             | 0.0         | 0.0              | 0.0 |
| Ribonucleoside triphosphate biosynthesis       | 0.0      | 0.0           | 0.0     | 0.0        | 0.0        | 0.0           | 0.0       | 0.0            | 0.0              | 0.0         | 0.0       | 0.0           | 0.0           | 0.0         | 0.0       | 0.0      | 0.0        | 0.0             | 0.0       | 2.1      | 0.0        | 0.0           | 0.0     | 0.0             | 0.0         | 0.0              | 0.0 |
| Nucleoside triphosphate biosynthetic processes | 0.0      | 0.0           | 0.0     | 0.0        | 0.0        | 0.0           | 0.0       | 0.0            | 0.0              | 0.0         | 0.0       | 0.0           | 0.0           | 0.0         | 0.0       | 0.0      | 0.0        | 0.0             | 0.0       | 1.6      | 0.0        | 0.0           | 0.0     | 0.0             | 0.0         | 0.0              | 0.0 |
| Nucleoside-triphosphate activity               | 0.0      | 0.0           | 0.0     | 0.0        | 0.0        | 0.0           | 0.0       | 0.0            | 0.0              | 0.0         | 0.0       | 0.0           | 0.0           | 0.0         | 0.0       | 0.0      | 0.0        | 0.0             | 0.0       | 0.0      | 1.7        | 0.0           | 0.0     | 0.0             | 0.0         | 0.0              | 0.0 |
| Damaged DNA-binding                            | 0.0      | 0.0           | 0.0     | 0.0        | 0.0        | 0.0           | 0.0       | 0.0            | 0.0              | 0.0         | 0.0       | 0.0           | 0.0           | 0.0         | 0.0       | 0.0      | 0.0        | 0.0             | 0.0       | 0.0      | 1.2        | 0.0           | 0.0     | 0.0             | 0.0         | 0.0              | 0.0 |
| RNA binding                                    | 0.0      | 0.0           | 0.0     | 0.0        | 0.0        | 0.0           | 0.0       | 0.0            | 0.0              | 0.0         | 0.0       | 0.0           | 0.0           | 0.0         | 0.0       | 0.0      | 0.0        | 0.0             | 0.0       | 0.0      | 0.0        | 14.4          | 0.0     | 0.0             | 0.0         | 0.0              | 0.0 |
| Ribosome biogenesis                            | 0.0      | 0.0           | 0.0     | 0.0        | 0.0        | 0.0           | 0.0       | 0.0            | 0.0              | 0.0         | 0.0       | 0.0           | 0.0           | 0.0         | 0.0       | 0.0      | 0.0        | 0.0             | 0.0       | 0.0      | 0.0        | 9.6           | 0.0     | 0.0             | 0.0         | 0.0              | 0.0 |
| Translation factor activity                    | 0.0      | 0.0           | 0.0     | 0.0        | 0.0        | 0.0           | 0.0       | 0.0            | 0.0              | 0.0         | 0.0       | 0.0           | 0.0           | 0.0         | 0.0       | 0.0      | 0.0        | 0.0             | 0.0       | 0.0      | 0.0        | 7.0           | 0.0     | 0.0             | 0.0         | 0.0              | 0.0 |
| tRNA aminoacylation for protein translation    | 0.0      | 0.0           | 0.0     | 0.0        | 0.0        | 0.0           | 0.0       | 0.0            | 0.0              | 0.0         | 0.0       | 0.0           | 0.0           | 0.0         | 0.0       | 0.0      | 0.0        | 0.0             | 0.0       | 0.0      | 0.0        | 5.0           | 0.0     | 0.0             | 0.0         | 0.0              | 0.0 |
| rRNA processing                                | 0.0      | 0.0           | 0.0     | 0.0        | 0.0        | 0.0           | 0.0       | 0.0            | 0.0              | 0.0         | 0.0       | 0.0           | 0.0           | 0.0         | 0.0       | 0.0      | 0.0        | 0.0             | 0.0       | 0.0      | 0.0        | 4.6           | 0.0     | 0.0             | 0.0         | 0.0              | 0.0 |
| GTP binding                                    | 0.0      | 0.0           | 0.0     | 0.0        | 0.0        | 0.0           | 0.0       | 0.0            | 0.0              | 0.0         | 0.0       | 0.0           | 0.0           | 0.0         | 0.0       | 0.0      | 0.0        | 0.0             | 0.0       | 0.0      | 0.0        | 3.6           | 0.0     | 0.0             | 0.0         | 0.0              | 0.0 |
| Primary metabolic processes                    | 0.0      | 0.0           | 0.0     | 0.0        | 0.0        | 0.0           | 0.0       | 0.0            | 0.0              | 0.0         | 0.0       | 0.0           | 0.0           | 0.0         | 0.0       | 0.0      | 0.0        | 0.0             | 0.0       | 0.0      | 0.0        | 3.2           | 0.0     | 0.0             | 0.0         | 0.0              | 0.0 |
| Nucleolus                                      | 0.0      | 0.0           | 0.0     | 0.0        | 0.0        | 0.0           | 0.0       | 0.0            | 0.0              | 0.0         | 0.0       | 0.0           | 0.0           | 0.0         | 0.0       | 0.0      | 0.0        | 0.0             | 0.0       | 0.0      | 0.0        | 1.4           | 0.0     | 0.0             | 0.0         | 0.0              | 0.0 |
| Nitrogen compound metabolic processes          | 0.0      | 0.0           | 0.0     | 0.0        | 0.0        | 0.0           | 0.0       | 0.0            | 0.0              | 0.0         | 0.0       | 0.0           | 0.0           | 0.0         | 0.0       | 0.0      | 0.0        | 0.0             | 0.0       | 0.0      | 0.0        | 1.3           | -1.5    | 0.0             | 0.0         | 0.0              | 0.0 |
| Fatty acid desaturase type I                   | 0.0      | 0.0           | 0.0     | 0.0        | 0.0        | 0.0           | 0.0       | 0.0            | 0.0              | 0.0         | 0.0       | 0.0           | 0.0           | 0.0         | 0.0       | 0.0      | 0.0        | 0.0             | 0.0       | 0.0      | 0.0        | 0.0           | 4.3     | 0.0             | 0.0         | 0.0              | 0.0 |
| Lipid metabolic processes                      | 0.0      | 0.0           | 0.0     | 0.0        | 0.0        | 0.0           | 0.0       | 0.0            | 0.0              | 0.0         | 0.0       | 0.0           | 0.0           | 0.0         | 0.0       | 0.0      | 0.0        | 0.0             | 0.0       | 0.0      | 0.0        | 0.0           | 2.3     | 0.0             | 0.0         | 0.0              | 0.0 |
| Iron ion binding                               | 0.0      | 0.0           | 0.0     | 0.0        | 0.0        | 0.0           | 0.0       | 0.0            | 0.0              | 0.0         | 0.0       | 0.0           | 0.0           | 0.0         | 0.0       | 0.0      | 0.0        | 0.0             | 0.0       | 0.0      | 0.0        | 0.0           | 1.3     | 0.0             | 0.0         | 0.0              | 0.0 |
| Phosphatase activity                           | 0.0      | 0.0           | 0.0     | 0.0        | 0.0        | 0.0           | 0.0       | 0.0            | 0.0              | 0.0         | 0.0       | 0.0           | 0.0           | 0.0         | 0.0       | 0.0      | 0.0        | 0.0             | 0.0       | 0.0      | 0.0        | 0.0           | 0.0     | 1.2             | 0.0         | 0.0              | 0.0 |
| Organic acid biosynthetic process              | 0.0      | 0.0           | 0.0     | 0.0        | 0.0        | 0.0           | 0.0       | 0.0            | 0.0              | 0.0         | 0.0       | 0.0           | 0.0           | 0.0         | 0.0       | 0.0      | 0.0        | 0.0             | 0.0       | 0.0      | 0.0        | 0.0           | 0.0     | 0.0             | 0.0         | 0.0              | 0.0 |
| Translation                                    | 0.0      | 0.0           | 0.0     | 0.0        | 0.0        | 0.0           | 0.0       | 0.0            | 0.0              | 0.0         | 0.0       | 0.0           | 0.0           | 0.0         | 0.0       | 0.0      | 0.0        | 0.0             | 0.0       | -1.7     | 19.0       | 0.0           | 0.0     | 0.0             | 51.1        | 0.0              | 0.0 |
| Nucleic                                        |          |               |         |            |            |               |           |                |                  |             |           |               |               |             |           |          |            |                 |           |          |            |               |         |                 |             |                  |     |
