# Supplementary material for: Transcriptional Orchestration of the Global Cellular Response of a Model Pennate Diatom to Diel Light Cycling under Iron Limitation
Source: PLoS Genet. 2016 Dec 14;12(12):e1006490. doi: 10.1371/journal.pgen.1006490 (PMC5156380; doi:10.1371/journal.pgen.1006490)
Supplement: S3 Dataset — (XLSX) [file pgen.1006490.s003.xlsx]

## Sheet: Table S4
S3 Dataset. List of low Fe induced genes involved in endocytosis, exocytosis and autophagy.
Column A-B: Gene model identifiers Phatr3 gene model used to map reads for RPKM calculations (pt3_ensemble_id), Phatr3 protein identifier (Phatr3 PID), alternate Phatr3 protein ID (Phatr3_AltID), corresponding Phatr2 protein identifer (Phatr2 PID).
Column C-E: Processes, description, and function identified (this study)
Column F: Response Type
Columns G-S: Functional annotations
Phatr3 PID	Phatr2 PID	Process	Process Description	Gene Function	Response Type (Skillings-Mack)	Uniprot ID	GO Description	Kegg Description	KO Description	KO Pathway	Pfam ID	Pfam Description	KOG ID	pt3_KOG_group	KOG class	pt3_KOG_desc	kog_phatr	pt3_TIGRFams_desc
Phatr3_J44229	44229	Autophagy	Autophagy is an intracellular degradation system that delivers cytoplasmic constituents to the lysosome and has been implicated as a universal recycling mechanism for cells to cope with nutrient deficiency in several organism, including chromalveolates	ATG-related	LoFe-UP	B5Y5S6	autophagy	hypothetical protein			PF04108||PF10377	Autophagy protein Apg17||Autophagy-related protein 11				hypothetical protein	hypothetical protein (44229)
Phatr3_J50209	50209	Autophagy		ATG-related	LoFe-UP	B7GDB5	positive regulation of autophagy	hypothetical protein			PF10186	UV radiation resistance protein and autophagy-related subunit 14				hypothetical protein	hypothetical protein ()
Phatr3_J9342	9342	Autophagy		ATG-related	LoFe-UP+DaUP	B7FRN1	catalytic activity	hypothetical protein; K08337 autophagy-related protein 7	autophagy-related protein 7	Regulation of autophagy	PF00899	ThiF family	KOG2337	METABOLISM	Coenzyme transport and metabolism	Ubiquitin activating E1 enzyme-like protein	Ubiquitin activating E1 enzyme-like protein (9342)
Phatr3_J31423	31423	Autophagy		ATG-related	LoFe-UP	B7FRA6	autophagy	hypothetical protein; K08334 beclin 1	beclin 1	Regulation of autophagy	PF04111	Autophagy protein Apg6	KOG2751	CELLULAR PROCESSES AND SIGNALING	Signal transduction mechanisms	Beclin-like protein	Beclin-like protein (31423)
Phatr3_Jdraft1767	1767_bd	Autophagy		ATG-related	LoFe-UP+DaUP	B7S4H9		hypothetical protein			PF10033	Autophagy-related protein 13				hypothetical protein	hypothetical protein (1767_bd)
Phatr3_J43402	43402	Autophagy		ATG-related	LoFe-UP+DaUP	B7FS48	autophagy	hypothetical protein; K08334 beclin 1	beclin 1	Regulation of autophagy	PF04111	Autophagy protein Apg6				hypothetical protein	hypothetical protein (43402)
Phatr3_J43913	43913	Autophagy		ATG-related	LoFe-UP+LiUP	B5Y4R4	cytoplasm||autophagy	hypothetical protein; K08339 autophagy-related protein 5	autophagy-related protein 5	Regulation of autophagy || RIG-I-like receptor signaling pathway || Shigellosis	PF04106	Autophagy protein Apg5	KOG2976	CELLULAR PROCESSES AND SIGNALING	Posttranslational modification, protein turnover, chaperones	Protein involved in autophagy and nutrient starvation	Protein involved in autophagy and nutrient starvation (43913)
Phatr3_J54789	54789	Endocytosis	Exocytosis requires endocytosis to maintain plasma membrane integrity. Endosomal coat protein (COP) subunits, adaptins, and putative GTPase proteins of the dynamin and Rab family occupy essential roles in the formation and budding-in process of clathrin-coated pits as well as in endosome sorting	adaptins	LoFe-UP	B7G4R0	intracellular protein transport||vesicle-mediated transport||membrane coat	hypothetical protein; K12397 AP-3 complex subunit beta	AP-3 complex subunit beta	Lysosome	PF01602||PF13646	Adaptin N terminal region||HEAT repeats	KOG1060	CELLULAR PROCESSES AND SIGNALING	Intracellular trafficking, secretion, and vesicular transport	Vesicle coat complex AP-3, beta subunit	Vesicle coat complex AP-3, beta subunit (54789)
Phatr3_J13511	13511	Endocytosis		adaptins	LoFe-UP	B5Y3G8	intracellular protein transport||vesicle-mediated transport||membrane coat||clathrin adaptor complex	hypothetical protein; K12391 AP-1 complex subunit gamma-1	AP-1 complex subunit gamma-1	Lysosome	PF01602||PF02883||PF13646	Adaptin N terminal region||Adaptin C-terminal domain||HEAT repeats	KOG1062	CELLULAR PROCESSES AND SIGNALING	Intracellular trafficking, secretion, and vesicular transport	Vesicle coat complex AP-1, gamma subunit	Vesicle coat complex AP-1, gamma subunit (13511)
Phatr3_J18241	18241	Endocytosis		adaptins	LoFe-UP	B7FSR7	protein binding||intracellular protein transport||vesicle-mediated transport||clathrin adaptor complex	AP3mu; hypothetical protein; K12398 AP-3 complex subunit mu	AP-3 complex subunit mu	Lysosome	PF00928	Adaptor complexes medium subunit family	KOG2740	CELLULAR PROCESSES AND SIGNALING	Intracellular trafficking, secretion, and vesicular transport	Clathrin-associated protein medium chain	Clathrin-associated protein medium chain (18241)
Phatr3_J27518	27518	Endocytosis		endosomal coat protein (COP) subunits	LoFe-UP	B7FZS9	structural molecule activity||protein binding||intracellular protein transport||vesicle-mediated transport||membrane coat	COPbeta2; hypothetical protein			PF00400||PF04053	WD domain, G-beta repeat||Coatomer WD associated region	KOG0276	CELLULAR PROCESSES AND SIGNALING	Intracellular trafficking, secretion, and vesicular transport	Vesicle coat complex COPI, beta' subunit	Vesicle coat complex COPI, beta' subunit (27518)
Phatr3_J43106	43106	Endocytosis		endosomal coat protein (COP) subunits	LoFe-UP	B7FQM8	cell redox homeostasis	hypothetical protein			PF00085||PF07970||PF13850	Thioredoxin||Endoplasmic reticulum vesicle transporter||Endoplasmic Reticulum-Golgi Intermediate Compartment (ERGIC)	KOG2667	CELLULAR PROCESSES AND SIGNALING	Intracellular trafficking, secretion, and vesicular transport	COPII vesicle protein	COPII vesicle protein (43106)
Phatr3_J30436	30436	Endocytosis		endosomal coat protein (COP) subunits	LoFe-UP	B7GAY9	protein binding||intracellular protein transport||vesicle-mediated transport||clathrin adaptor complex	COPdelta; hypothetical protein			PF00928	Adaptor complexes medium subunit family	KOG2635	CELLULAR PROCESSES AND SIGNALING	Intracellular trafficking, secretion, and vesicular transport	Medium subunit of clathrin adaptor complex	Medium subunit of clathrin adaptor complex (30436)
Phatr3_J9509	9509	Endocytosis		endosomal coat protein (COP) subunits	LoFe-UP	B7FPS4		hypothetical protein			PF07970||PF13850	Endoplasmic reticulum vesicle transporter||Endoplasmic Reticulum-Golgi Intermediate Compartment (ERGIC)	KOG2667	CELLULAR PROCESSES AND SIGNALING	Intracellular trafficking, secretion, and vesicular transport	COPII vesicle protein	COPII vesicle protein (9509)
Phatr3_J44216	44216	Endocytosis		putative GTPase proteins of the dynamin and Rab family	LoFe-UP	B5Y5R2	GTP binding||intracellular||small GTPase mediated signal transduction	RabX2; hypothetical protein			PF00025||PF00071||PF08477||PF09439	ADP-ribosylation factor family||Ras family||Miro-like protein||Signal recognition particle receptor beta subunit	KOG0078	CELLULAR PROCESSES AND SIGNALING	Signal transduction mechanisms	GTP-binding protein SEC4, small G protein superfamily, and related Ras family GTP-binding proteins	GTP-binding protein SEC4, small G protein superfamily, and related Ras family GTP-binding proteins (44216)	small GTP-binding protein domain||_GAP_
Phatr3_J8770	8770	Endocytosis		putative GTPase proteins of the dynamin and Rab family	LoFe-UP	B7FR62	GTPase activity||GTP binding	hypothetical protein			PF00350||PF01926	Dynamin family||50S ribosome-binding GTPase	KOG1954	CELLULAR PROCESSES AND SIGNALING	Signal transduction mechanisms	Endocytosis/signaling protein EHD1	Endocytosis/signaling protein EHD1 (8770)
Phatr3_J14787	14787	Endocytosis		putative GTPase proteins of the dynamin and Rab family	LoFe-UP	B8BQ51	GTPase activity||GTP binding	hypothetical protein			PF00350||PF01926	Dynamin family||50S ribosome-binding GTPase	KOG1954	CELLULAR PROCESSES AND SIGNALING	Signal transduction mechanisms	Endocytosis/signaling protein EHD1	Endocytosis/signaling protein EHD1 (14787)
Phatr3_EG02177		Endocytosis		putative GTPase proteins of the dynamin and Rab family	LoFe-UP+DaUP	B7FPP1	GTPase activity||GTP binding||ferrous iron transmembrane transporter activity||ferrous iron transport||integral component of membrane	hypothetical protein; K06944			PF00350||PF01926||PF02421||PF02824	Dynamin family||50S ribosome-binding GTPase||Ferrous iron transport protein B||TGS domain	KOG1486	CELLULAR PROCESSES AND SIGNALING	Signal transduction mechanisms	GTP-binding protein DRG2 (ODN superfamily)	GTP-binding protein DRG2 (ODN superfamily) (50671)	small GTP-binding protein domain||_GAP_
Phatr3_J30394	30394	Endocytosis		putative GTPase proteins of the dynamin and Rab family	LoFe-UP+DaUP	B7GAU1	GTPase activity||GTP binding	hypothetical protein; K12483 EH domain-containing protein 1	EH domain-containing protein 1	Endocytosis	PF00350||PF01926||PF12763	Dynamin family||50S ribosome-binding GTPase||Cytoskeletal-regulatory complex EF hand	KOG1954	CELLULAR PROCESSES AND SIGNALING	Signal transduction mechanisms	Endocytosis/signaling protein EHD1	Endocytosis/signaling protein EHD1 (30394)
Phatr3_EG02577		Endocytosis		v-SNARE	LoFe-UP	B7GBR9	intracellular protein transport||membrane	hypothetical protein; K08493 vesicle transport through interaction with t-SNAREs 1	vesicle transport through interaction with t-SNAREs 1	SNARE interactions in vesicular transport	PF05008||PF12352	Vesicle transport v-SNARE protein N-terminus||Snare region anchored in the vesicle membrane C-terminus	KOG1666	CELLULAR PROCESSES AND SIGNALING	Intracellular trafficking, secretion, and vesicular transport	V-SNARE	V-SNARE ()
Phatr3_J44987	44987	Endocytosis		v-SNARE	LoFe-UP+DaUP	B7FV68		hypothetical protein			PF08507	COPI associated protein				hypothetical protein	hypothetical protein (44987)
Phatr3_J19089	19089	Endocytosis, exocytosis, and/or autophagy	Vesicle-mediated transport and protein localization processes which could work both in the context of endo- and exocytosis, as well as autophagy, since all these processes require substantive relocation of macromolecules within the cell. Exocyst complex genes are involved in tethering Golgi-derived secretory vesicles to the plasma membrane. Cytoskeleton compoenents and multiple transmembrane doma…	Cytoskeleton/actin-myosin filaments	LoFe-UP+DaUP	B7FUJ2		GEL3; gelosin/severin like protein; K05768 gelsolin	gelsolin	Fc gamma R-mediated phagocytosis || Regulation of actin cytoskeleton || Viral carcinogenesis	PF00626	Gelsolin repeat	KOG0443	CELLULAR PROCESSES AND SIGNALING	Cytoskeleton	Actin regulatory proteins (gelsolin/villin family)	Actin regulatory proteins (gelsolin/villin family) (19089)
Phatr3_J53980	53980	Endocytosis, exocytosis, and/or autophagy		Cytoskeleton/actin-myosin filaments	LoFe-UP+DaUP	B7FPI9		GEL1; gelsolin			PF00626	Gelsolin repeat	KOG0443	CELLULAR PROCESSES AND SIGNALING	Cytoskeleton	Actin regulatory proteins (gelsolin/villin family)	Actin regulatory proteins (gelsolin/villin family) (53980)
Phatr3_J9601	9601	Endocytosis, exocytosis, and/or autophagy		Cytoskeleton/actin-myosin filaments	LoFe-UP+DaUP	B7FPL9	actin binding||F-actin capping protein complex||actin cytoskeleton organization||WASH complex	"protein of f-actin capping protein; K10365 capping protein (actin filament) muscle Z-line, beta"	"capping protein (actin filament) muscle Z-line, beta"		PF01115	F-actin capping protein, beta subunit	KOG3174	CELLULAR PROCESSES AND SIGNALING	Cytoskeleton	F-actin capping protein, beta subunit	F-actin capping protein, beta subunit (9601)
Phatr3_J11198	11198	Endocytosis, exocytosis, and/or autophagy		Cytoskeleton/actin-myosin filaments	LoFe-UP	B7FV80	microtubule motor activity||ATP binding||microtubule-based movement||microtubule binding	Pt-KIF9; mcak-like kinesin-like protein; K10393 kinesin family member 2/24	kinesin family member 2/24		PF00225	Kinesin motor domain	KOG0246	CELLULAR PROCESSES AND SIGNALING	Cytoskeleton	Kinesin-like protein	Kinesin-like protein (11198)
Phatr3_J47936	47936	Endocytosis, exocytosis, and/or autophagy		Cytoskeleton/actin-myosin filaments	LoFe-UP	B7G5E9	protein binding	hypothetical protein			PF02985	HEAT repeat	KOG1820	CELLULAR PROCESSES AND SIGNALING	Cytoskeleton	Microtubule-associated protein	Microtubule-associated protein (47936)
Phatr3_J20837	20837	Endocytosis, exocytosis, and/or autophagy		Cytoskeleton/actin-myosin filaments	LoFe-UP	B7G1C1		ARP; actin related protein			PF00022	Actin	KOG0679	CELLULAR PROCESSES AND SIGNALING	Cytoskeleton	Actin-related protein - Arp4p/Act3p	Actin-related protein - Arp4p/Act3p (20837)
Phatr3_J7359		Endocytosis, exocytosis, and/or autophagy		Cytoskeleton/actin-myosin filaments	LoFe-UP	B7G973	microtubule motor activity||ATP binding||microtubule-based movement||microtubule binding	Pt-KIF13; kinesin family-like protein			PF00225	Kinesin motor domain	KOG0242	CELLULAR PROCESSES AND SIGNALING	Cytoskeleton	Kinesin-like protein	Kinesin-like protein (7359)
Phatr3_J25867	25867	Endocytosis, exocytosis, and/or autophagy		Cytoskeleton/actin-myosin filaments	LoFe-UP+DaUP	B5Y5J3	motor activity||ATP binding||myosin complex	myoC1; hypothetical protein			PF00063	Myosin head (motor domain)	KOG0160	CELLULAR PROCESSES AND SIGNALING	Cytoskeleton	Myosin class V heavy chain	Myosin class V heavy chain (25867)
Phatr3_J54602	54602	Endocytosis, exocytosis, and/or autophagy		Cytoskeleton/actin-myosin filaments	LoFe-UP+DaUP	B7G1P5	protein binding	hypothetical protein			PF00515||PF01535||PF07719||PF10602||PF12895||PF13174||PF13176||PF13181||PF13371||PF13374||PF13414||PF13424||PF13428||PF13431||PF13432||PF14559||PF14938	Tetratricopeptide repeat||PPR repeat||Tetratricopeptide repeat||26S proteasome subunit RPN7||Anaphase-promoting complex, cyclosome, subunit 3||Tetratricopeptide repeat||Tetratricopeptide repeat||Tetratricopeptide repeat||Tetratricopeptide repeat||Tetratricopeptide repeat||TPR repeat||Tetratricopeptide repeat||Tetratricopeptide repeat||Tetratricopeptide repeat||Tetratricopeptide repeat||Tetratrico…	KOG1840	CELLULAR PROCESSES AND SIGNALING	Cytoskeleton	Kinesin light chain	Kinesin light chain (54602)
Phatr3_J48471	48471	Endocytosis, exocytosis, and/or autophagy		Cytoskeleton/actin-myosin filaments	LoFe-UP+DaUP	B7G794	protein binding	hypothetical protein			PF00515||PF07719||PF13176||PF13181||PF13374||PF13414||PF13424||PF13432	Tetratricopeptide repeat||Tetratricopeptide repeat||Tetratricopeptide repeat||Tetratricopeptide repeat||Tetratricopeptide repeat||TPR repeat||Tetratricopeptide repeat||Tetratricopeptide repeat	KOG1840	CELLULAR PROCESSES AND SIGNALING	Cytoskeleton	Kinesin light chain	Kinesin light chain (48471)
Phatr3_J51848	51848	Endocytosis, exocytosis, and/or autophagy		Cytoskeleton/actin-myosin filaments	LoFe-UP	B7FXM4	motor activity||ATP binding||myosin complex	myoC3; hypothetical protein			PF00063	Myosin head (motor domain)	KOG0160	CELLULAR PROCESSES AND SIGNALING	Cytoskeleton	Myosin class V heavy chain	Myosin class V heavy chain (51848)
Phatr3_J52058	52058	Endocytosis, exocytosis, and/or autophagy		Cytoskeleton/actin-myosin filaments	LoFe-UP	B7G1E5	motor activity||protein kinase activity||protein binding||ATP binding||protein phosphorylation||myosin complex	myoA1; hypothetical protein			PF00063||PF00069||PF00612||PF12796||PF13637||PF13857	Myosin head (motor domain)||Protein kinase domain||IQ calmodulin-binding motif||Ankyrin repeats (3 copies)||Ankyrin repeats (many copies)||Ankyrin repeats (many copies)	KOG0160	CELLULAR PROCESSES AND SIGNALING	Cytoskeleton	Myosin class V heavy chain	Myosin class V heavy chain (52058)
Phatr3_J11271	11271	Endocytosis, exocytosis, and/or autophagy		Cytoskeleton/actin-myosin filaments	LoFe-UP	B7FV88		hypothetical protein			PF03398	Regulator of Vps4 activity in the MVB pathway	KOG2027	CELLULAR PROCESSES AND SIGNALING	Cytoskeleton	Spindle pole body protein	Spindle pole body protein (11271)
Phatr3_J46169	46169	Endocytosis, exocytosis, and/or autophagy		Cytoskeleton/actin-myosin filaments	LoFe-UP	B7G0A2		hypothetical protein; K13110 microfibrillar-associated protein 1	microfibrillar-associated protein 1		PF06991	Splicing factor, Prp19-binding domain	KOG1425	CELLULAR PROCESSES AND SIGNALING	Cytoskeleton	Microfibrillar-associated protein MFAP1	Microfibrillar-associated protein MFAP1 (46169)
Phatr3_J44225	44225	Endocytosis, exocytosis, and/or autophagy		Cytoskeleton/actin-myosin filaments	LoFe-UP	B5Y5S1	GTPase activity||GTP binding||GTP catabolic process||protein complex||protein polymerization	Gamma-tub; hypothetical protein; K10389 tubulin gamma	tubulin gamma		PF00091||PF03953	Tubulin/FtsZ family, GTPase domain||Tubulin C-terminal domain	KOG1374	CELLULAR PROCESSES AND SIGNALING	Cytoskeleton	Gamma tubulin	Gamma tubulin (44225)
Phatr3_J47733	47733	Endocytosis, exocytosis, and/or autophagy		Exocyst Complex	LoFe-UP	B7G4Q1	exocyst||exocytosis	hypothetical protein			PF06046	Exocyst complex component Sec6				hypothetical protein	hypothetical protein (47733)
Phatr3_J47327	47327	Endocytosis, exocytosis, and/or autophagy		Exocyst Complex	LoFe-UP	B7G2Z1	exocyst||exocytosis	hypothetical protein; K07195 exocyst complex component 7	exocyst complex component 7	Insulin signaling pathway	PF03081	Exo70 exocyst complex subunit	KOG2344	CELLULAR PROCESSES AND SIGNALING	Intracellular trafficking, secretion, and vesicular transport	Exocyst component protein and related proteins	Exocyst component protein and related proteins (47327)
Phatr3_J40521	40521	Endocytosis, exocytosis, and/or autophagy		SNARE homologs - mediating targeted membrane fusion	LoFe-UP	B7GBR9	intracellular protein transport||membrane	hypothetical protein; K08493 vesicle transport through interaction with t-SNAREs 1	vesicle transport through interaction with t-SNAREs 1	SNARE interactions in vesicular transport	PF05008||PF12352	Vesicle transport v-SNARE protein N-terminus||Snare region anchored in the vesicle membrane C-terminus	KOG1666	CELLULAR PROCESSES AND SIGNALING	Intracellular trafficking, secretion, and vesicular transport	V-SNARE	V-SNARE (40521)
Phatr3_J43244	43244	Endocytosis, exocytosis, and/or autophagy		SNARE homologs - mediating targeted membrane fusion	LoFe-UP	B7FR42		hypothetical protein; K08493 vesicle transport through interaction with t-SNAREs 1	vesicle transport through interaction with t-SNAREs 1	SNARE interactions in vesicular transport	PF12352	Snare region anchored in the vesicle membrane C-terminus	KOG1666	CELLULAR PROCESSES AND SIGNALING	Intracellular trafficking, secretion, and vesicular transport	V-SNARE	V-SNARE (43244)
Phatr3_J17683	17683	Endocytosis, exocytosis, and/or autophagy		SNARE homologs - mediating targeted membrane fusion	LoFe-UP	B7FQ64	integral component of membrane||vesicle-mediated transport	SybA; hypothetical protein; K08515 vesicle-associated membrane protein 7	vesicle-associated membrane protein 7	SNARE interactions in vesicular transport	PF00957||PF13774	Synaptobrevin||Regulated-SNARE-like domain	KOG0859	CELLULAR PROCESSES AND SIGNALING	Intracellular trafficking, secretion, and vesicular transport	Synaptobrevin/VAMP-like protein	Synaptobrevin/VAMP-like protein (17683)
Phatr3_J49194	49194	Glycosylation and Oligosaccharide Processing	Protein production through the secretory system also often involves glycosylation and oligosaccharide processing, playing essential roles in functioning and sorting of proteins to the proper cellular destination. Putative galactosyl transferases and mannosyltransferases could facilitate this process .	galactosyl transferase	LoFe-UP	B7G9S9	protein glycosylation||galactosyltransferase activity||membrane	hypothetical protein			PF01762	Galactosyltransferase				hypothetical protein	hypothetical protein (49194)
Phatr3_J40785	40785	Glycosylation and Oligosaccharide Processing		galactosyl transferase	LoFe-UP	B7GCE7		hypothetical protein					KOG2246	METABOLISM	Carbohydrate transport and metabolism	Galactosyltransferases	Galactosyltransferases (40785)
Phatr3_EG00115		Glycosylation and Oligosaccharide Processing		galactosyl transferase	LoFe-UP	B7PV39	"protein glycosylation||galactosyltransferase activity||membrane||transferase activity, transferring glycosyl groups"	"galactosyltransferase, putative (EC:2.4.1.62)"			PF01762||PF02434	Galactosyltransferase||Fringe-like	KOG2287	METABOLISM	Carbohydrate transport and metabolism	Galactosyltransferases	Galactosyltransferases ()
Phatr3_J50257	50257	Glycosylation and Oligosaccharide Processing		galactosyl transferase	LoFe-UP	B7GDH1		hypothetical protein					KOG2246	METABOLISM	Carbohydrate transport and metabolism	Galactosyltransferases	Galactosyltransferases (50257)
Phatr3_J44574	44574	Glycosylation and Oligosaccharide Processing		mannosyltransferase	LoFe-UP	B7FUJ6	"transferase activity, transferring glycosyl groups"	"hypothetical protein; K03846 alpha-1,2-mannosyltransferase [EC:2.4.1.-]"	"alpha-1,2-mannosyltransferase [EC:2.4.1.259 2.4.1.261]"	N-Glycan biosynthesis || Various types of N-glycan biosynthesis	PF03901	Alg9-like mannosyltransferase family	KOG2515	CELLULAR PROCESSES AND SIGNALING	Cell wall/membrane/envelope biogenesis	Mannosyltransferase	Mannosyltransferase (44574)
Phatr3_J14002	14002	Glycosylation and Oligosaccharide Processing		mannosyltransferase	LoFe-UP	B7G3V4		"beta-mannosyltransferase; K03842 beta-1,4-mannosyltransferase [EC:2.4.1.142]"	"beta-1,4-mannosyltransferase [EC:2.4.1.142]"	N-Glycan biosynthesis || Various types of N-glycan biosynthesis	PF13579||PF13692	Glycosyl transferase 4-like domain||Glycosyl transferases group 1	KOG2941	CELLULAR PROCESSES AND SIGNALING	Posttranslational modification, protein turnover, chaperones	Beta-1,4-mannosyltransferase	Beta-1,4-mannosyltransferase (14002)
Phatr3_EG00407		Glycosylation and Oligosaccharide Processing		mannosyltransferase	LoFe-UP	B7FTR7	"integral component of membrane||transferase activity, transferring hexosyl groups"	hypothetical protein			PF03314||PF05637	Protein of unknown function, DUF273||galactosyl transferase GMA12/MNN10 family	KOG4748	METABOLISM	Carbohydrate transport and metabolism	Subunit of Golgi mannosyltransferase complex	Subunit of Golgi mannosyltransferase complex ()
Phatr3_EG02374	36_bd	Glycosylation and Oligosaccharide Processing		mannosyltransferase	LoFe-UP	B7S490	"mannosyl-oligosaccharide 1,2-alpha-mannosidase activity||calcium ion binding||membrane"	"hypothetical protein; K01230 mannosyl-oligosaccharide alpha-1,2-mannosidase [EC:3.2.1.113]"	"mannosyl-oligosaccharide alpha-1,2-mannosidase [EC:3.2.1.113]"	N-Glycan biosynthesis || Various types of N-glycan biosynthesis || Protein processing in endoplasmic reticulum	PF01532	Glycosyl hydrolase family 47	KOG2204	METABOLISM	Carbohydrate transport and metabolism	Mannosyl-oligosaccharide alpha-1,2-mannosidase and related glycosyl hydrolases	Mannosyl-oligosaccharide alpha-1,2-mannosidase and related glycosyl hydrolases (36_bd)
Phatr3_EG01481		Phosphoinositide Metabolism	Endo/exocytosis is regulated by phosphoinositides (Pis) Phosphatidylinositol-3(4)-kinases are esponsible for the production of PtdIns(3)P and PtIns(4)P, which are central to the coordination of membrane trafficking, by modulating attraction of protein components during budding, docking and fusion of membrane targets.	IMPase (inositol monophosphatase)	LoFe-UP+DaUP	Q00U90	phosphatidylinositol phosphorylation	Inositol monophosphatase (ISS)			PF00459	Inositol monophosphatase family	KOG3099	METABOLISM	Nucleotide transport and metabolism	Bisphosphate 3'-nucleotidase BPNT1/Inositol polyphosphate 1-phosphatase	Bisphosphate 3'-nucleotidase BPNT1/Inositol polyphosphate 1-phosphatase ()
Phatr3_J4918	4918	Phosphoinositide Metabolism		phosphatidylinositol-3(4)-kinases	LoFe-UP+DaUP	B7FXT2	"phosphotransferase activity, alcohol group as acceptor"	hypothetical protein			PF00454	Phosphatidylinositol 3- and 4-kinase	KOG2381	CELLULAR PROCESSES AND SIGNALING	Signal transduction mechanisms	Phosphatidylinositol 4-kinase	Phosphatidylinositol 4-kinase (4918)
Phatr3_J7164		Phosphoinositide Metabolism		phosphatidylinositol-3(4)-kinases	LoFe-UP+DaUP	B8C2X5	"phosphotransferase activity, alcohol group as acceptor"	phosphatidylinositol 4-kinase-like protein; K00888 phosphatidylinositol 4-kinase [EC:2.7.1.67]	phosphatidylinositol 4-kinase [EC:2.7.1.67]	Inositol phosphate metabolism || Phosphatidylinositol signaling system	PF00454	Phosphatidylinositol 3- and 4-kinase	KOG0903	CELLULAR PROCESSES AND SIGNALING	Signal transduction mechanisms	Phosphatidylinositol 4-kinase, involved in intracellular trafficking and secretion	Phosphatidylinositol 4-kinase, involved in intracellular trafficking and secretion (7164)
Phatr3_J30282	30282	Phosphoinositide Metabolism		phosphatidylinositol-3(4)-kinases	LoFe-UP	B7GAC4	"phosphotransferase activity, alcohol group as acceptor"	hypothetical protein; K00914 phosphatidylinositol 3-kinase [EC:2.7.1.137]	phosphatidylinositol 3-kinase [EC:2.7.1.137]	Inositol phosphate metabolism || Phosphatidylinositol signaling system || Regulation of autophagy || Phagosome || Tuberculosis	PF00454||PF00613	Phosphatidylinositol 3- and 4-kinase||Phosphoinositide 3-kinase family, accessory domain (PIK domain)	KOG0906	CELLULAR PROCESSES AND SIGNALING	Signal transduction mechanisms	Phosphatidylinositol 3-kinase VPS34, involved in signal transduction	Phosphatidylinositol 3-kinase VPS34, involved in signal transduction (30282)
Phatr3_J42683	42683	Phosphoinositide Metabolism		phosphatidylinositol-3(4)-kinases	LoFe-UP+DaUP	B7FP63	phosphatidylinositol phospholipase C activity||protein binding||lipid metabolic process||signal transduction||intracellular signal transduction	"PLC-delta; phospholipase C isoform delta; K05857 phospholipase C, delta [EC:3.1.4.11]"	"phosphatidylinositol phospholipase C, delta [EC:3.1.4.11]"	Inositol phosphate metabolism || Calcium signaling pathway || Phosphatidylinositol signaling system	PF00168||PF00387||PF00388	C2 domain||Phosphatidylinositol-specific phospholipase C, Y domain||Phosphatidylinositol-specific phospholipase C, X domain	KOG0169	CELLULAR PROCESSES AND SIGNALING	Signal transduction mechanisms	Phosphoinositide-specific phospholipase C	Phosphoinositide-specific phospholipase C (42683)
Phatr3_Jdraft1611	1611_bd	Phosphoinositide Metabolism		phospholipase C enzymes	LoFe-UP+DaUP	B7S3T2	phosphatidylinositol phospholipase C activity||lipid metabolic process||signal transduction||intracellular signal transduction	"hypothetical protein || phospholipase; K05857 phospholipase C, delta [EC:3.1.4.11]"			PF00387||PF00388	Phosphatidylinositol-specific phospholipase C, Y domain||Phosphatidylinositol-specific phospholipase C, X domain	KOG0169	CELLULAR PROCESSES AND SIGNALING	Signal transduction mechanisms	Phosphoinositide-specific phospholipase C	Phosphoinositide-specific phospholipase C ()
Phatr3_Jdraft1000	1000_bd	Phosphoinositide Metabolism		phospholipase C enzymes	LoFe-UP+DaUP	B7S3T2	phosphatidylinositol phospholipase C activity||lipid metabolic process||signal transduction||intracellular signal transduction	"hypothetical protein || phospholipase; K05857 phospholipase C, delta [EC:3.1.4.11]"			PF00387||PF00388	Phosphatidylinositol-specific phospholipase C, Y domain||Phosphatidylinositol-specific phospholipase C, X domain	KOG0169	CELLULAR PROCESSES AND SIGNALING	Signal transduction mechanisms	Phosphoinositide-specific phospholipase C	Phosphoinositide-specific phospholipase C (1611_bd)
Phatr3_J19669	19669	Vesicular Sorting (multivesicular body sorting, MVB)	Late steps of vesicular sorting often involves a so-called multivesicular body (MVB) sorting pathway. MVBs have not yet been detected in diatoms but are known in plants and green algae. Cargoes destined for delivery in MVBs, such as internalized receptors, are selected on the basis of ubiquitin signals that can depend on the binding of an endosomal sorting complex required for transport, ESCRT. I…	ESCRT complex component	LoFe-UP	B7FWQ6		hypothetical protein; K12184 ESCRT-I complex subunit VPS28	ESCRT-I complex subunit VPS28	Endocytosis	PF03997	VPS28 protein	KOG3284	CELLULAR PROCESSES AND SIGNALING	Intracellular trafficking, secretion, and vesicular transport	Vacuolar sorting protein VPS28	Vacuolar sorting protein VPS28 (19669)
Phatr3_J49632	49632	Vesicular Sorting (multivesicular body sorting, MVB)		ESCRT complex component	LoFe-UP	B7GBA3	cellular protein modification process||protein transport	hypothetical protein; K12183 ESCRT-I complex subunit TSG101	ESCRT-I complex subunit TSG101	Endocytosis	PF05743||PF09454	UEV domain||Vps23 core domain	KOG2391	CELLULAR PROCESSES AND SIGNALING	Posttranslational modification, protein turnover, chaperones	Vacuolar sorting protein/ubiquitin receptor VPS23	Vacuolar sorting protein/ubiquitin receptor VPS23 (49632)
Phatr3_J44534	44534	Vesicular Sorting (multivesicular body sorting, MVB)		ESCRT complex component	LoFe-UP+DaUP	B7FUF4		hypothetical protein; K12190 ESCRT-II complex subunit VPS36	ESCRT-II complex subunit VPS36	Endocytosis	PF04157	EAP30/Vps36 family	KOG2760	CELLULAR PROCESSES AND SIGNALING	Intracellular trafficking, secretion, and vesicular transport	Vacuolar sorting protein VPS36	Vacuolar sorting protein VPS36 (44534)
Phatr3_J16493	16493	Vesicular Sorting (multivesicular body sorting, MVB)		ESCRT complex component	LoFe-UP+DaUP	B7GCX0		hypothetical protein; K12188 ESCRT-II complex subunit VPS22	ESCRT-II complex subunit VPS22	Endocytosis	PF04157	EAP30/Vps36 family	KOG3341	INFORMATION STORAGE AND PROCESSING	Transcription	RNA polymerase II transcription factor complex subunit	RNA polymerase II transcription factor complex subunit (16493)
Phatr3_EG02615	50446	Vesicular Sorting (multivesicular body sorting, MVB)		vaculolar protein sorting (Vps) proteins	LoFe-UP	B7GE52	"retrograde transport, endosome to Golgi"	hypothetical protein			PF07928	Vps54-like protein	KOG2115	CELLULAR PROCESSES AND SIGNALING	Intracellular trafficking, secretion, and vesicular transport	Vacuolar sorting protein VPS45	Vacuolar sorting protein VPS45 (50446)
Phatr3_J42975	42975	Vesicular Sorting (multivesicular body sorting, MVB)		vaculolar protein sorting (Vps) proteins	LoFe-UP	B7FQ74	vesicle docking involved in exocytosis||vesicle-mediated transport	hypothetical protein			PF00995	Sec1 family	KOG1302	CELLULAR PROCESSES AND SIGNALING	Intracellular trafficking, secretion, and vesicular transport	Vacuolar sorting protein VPS33/slp1 (Sec1 family)	Vacuolar sorting protein VPS33/slp1 (Sec1 family) (42975)
Phatr3_J45401	45401	Vesicular Sorting (multivesicular body sorting, MVB)		vaculolar protein sorting (Vps) proteins	LoFe-UP	B7FXK1	phosphatidylinositol binding	hypothetical protein			PF00787	PX domain	KOG2273	CELLULAR PROCESSES AND SIGNALING	Intracellular trafficking, secretion, and vesicular transport	Membrane coat complex Retromer, subunit VPS5/SNX1, Sorting nexins, and related PX domain-containing proteins	Membrane coat complex Retromer, subunit VPS5/SNX1, Sorting nexins, and related PX domain-containing proteins (45401)
Phatr3_J47275	47275	Vesicular Sorting (multivesicular body sorting, MVB)		vaculolar protein sorting (Vps) proteins	LoFe-UP	B7G3T9	cytoplasm||intracellular protein transport	hypothetical protein			PF04840||PF04841	Vps16, C-terminal region||Vps16, N-terminal region	KOG2280	CELLULAR PROCESSES AND SIGNALING	Intracellular trafficking, secretion, and vesicular transport	Vacuolar assembly/sorting protein VPS16	Vacuolar assembly/sorting protein VPS16 (47275)
Phatr3_J6433	6433	Vesicular Sorting (multivesicular body sorting, MVB)		vaculolar protein sorting (Vps) proteins	LoFe-UP	B7G9T1	protein transport	hypothetical protein			PF03357	Snf7	KOG3230	CELLULAR PROCESSES AND SIGNALING	Intracellular trafficking, secretion, and vesicular transport	Vacuolar assembly/sorting protein DID4	Vacuolar assembly/sorting protein DID4 (6433)
